# Supplementary material for: The identification and characterization of an oxalyl-CoA synthetase from grass pea (Lathyrus sativus L.)
Source: Royal Society of Chemistry journal article supplement (doi:10.1039/d1cb00202c), 2022-01-01
Supplement: d1cb00202c1.pdf [file d1cb00202c1.pdf]

### Supplementary Figures and Tables

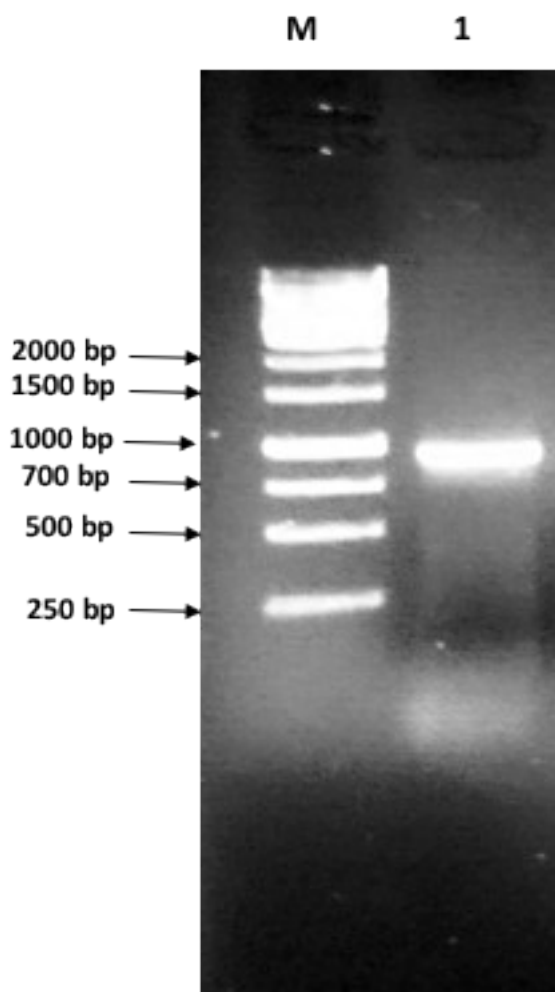

**Figure S1. Agarose gel electrophoresis of the OCS nucleotide consensus region amplified from grass pea genomic DNA.**

A consensus sequence region of ~1kb was identified using a multiple sequence alignment of *LsOCS* genes. The region was PCR amplified from genomic, grass pea DNA using primers F393-OCS and R1366-OCS (see **Materials and Methods**). The PCR product was analyzed by electrophoresis on a 1.0% agarose gel. Lane M, molecular size marker 1kb (Thermo scientific©); lane 1, PCR product from *LsOCS* (expected size of 938bp).

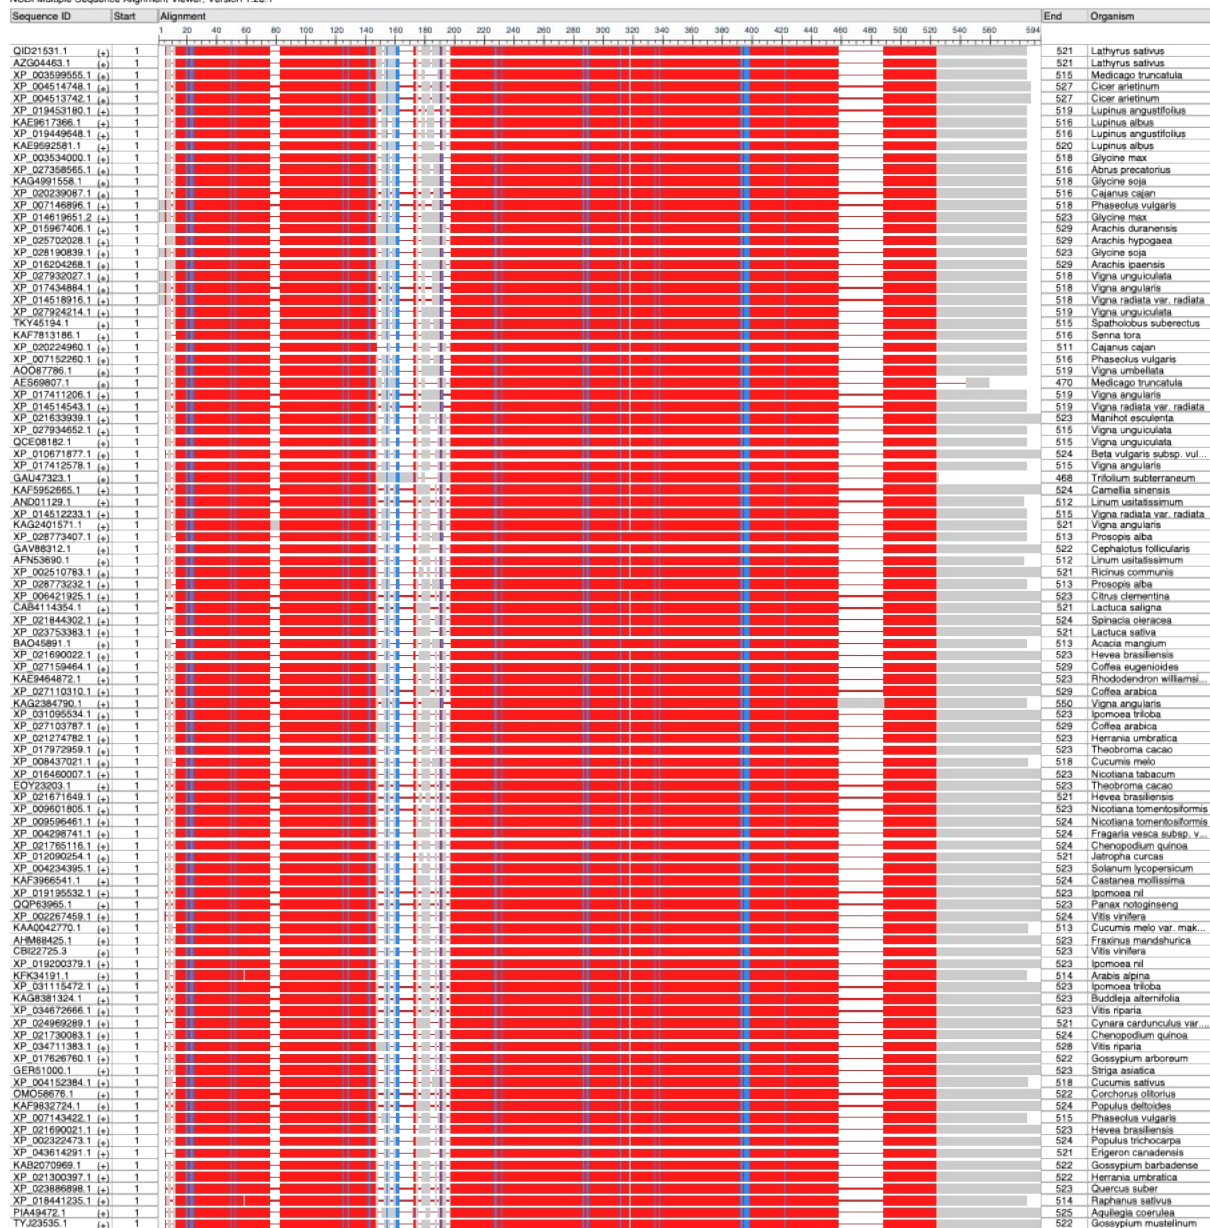

**Figure S2. A graphical representation of a multiple protein sequence alignment of LsOCS.**

A BlastP database search was performed using the protein sequence of LsOCS at the NCBI website (<https://blast.ncbi.nlm.nih.gov/Blast.cgi?PAGE=Proteins>) against the non-redundant (NR) database with default parameters. A multiple sequence alignment of 100 homologous proteins with sequence identity >76% is presented. Sequence regions are colored according to degree of conservation based on the residue's relative entropy threshold. Red color indicates highly conserved regions and blue indicates less conserved ones. The top sequence is that of LsOCS.

### S3a. His-SUMO-LsOCS DNA sequence:

ATGAGCAAGCATCACCATCATTTCAGGCCATCACCATACCGGACACCACCATCATTTCAGGCAGTC  
ATCACCATTCCGGATCTGCTGCGGGTGGCGAAGAAGATAAGAAACCGGCAGGTGGCGAAGGTGG  
CGGTGCCCATATCAACCTGAAAGTGAAAGGTCAAGACGGCAACGAAGTCTTTTTCCGCATCAAA  
CGTTCTACCCAGCTGAAAAAGCTGATGAACGCATACTGTGACCGTCAGTCTGTAGACATGACCG  
CAATTGCTTTCCTGTTTGATGGTCGTCGCCTGCGTGCGGAACAGACCCCGGATGAACTGGAGAT  
GGAAGATGGCGACGAAATCGACGCAATGCTTCATCAGACTGGTGGCGAAACCGCAACCACCCTC  
ACCGGTTTACTCCAATCCGTCGCCAAAACATTCCCCTCTCGACGTGGCATCTCCCTCGCCGGAA  
AATTCGACCTCACTCACTCTCATCTTAACGAATTAGTCGAATCTGCCGCAGATCATCTCATCTC  
TGCCGGAATCAAACCAAACGACGTCGTCGCTCTTACTTTCCCCAACACCGTCGAGTATGTTATA  
TTGTTTTTAGCTGTTATTCGAGTCCGAGCCACGGCGGCGCCTTTGAATGCAGCTTATACAGCTG  
AAGAATTCGAGTTTTATCTATCTGACTCCGAATCCAAGCTTCTATTAACGCCTTTAGAAGGTAA  
CAAGCCGGCGCAAGACGCGGCTTCAAAGCTCAGTATTCCTCTCGGCTCGGCTTCTCTCACGAAA  
TCTGAAGAAGAAACCAAGCTTACAATCTCCCTGAAACATCCCGAGTCAGGTTTAAATCTGACT  
CAGTAAACTCGGTGGCCAAACTCATTAACGAACCATCCGACGTGGCACTTTTTCTTCACACATC  
AGGTACCACGAGTCGTCCCAAGGGAGTTCCTACTGACTCAACACAACCTGGTTTCGTCTGTCAAA  
AACATCCAATCGGTTTACCAACTCACTGAATCAGATTCAACCGTGATCGTGCTTCCACTTTTTTC  
ACGTTACGGGTTAATCGCTGGATTGCTGAGTTCACTGGGTTCCGGGGCTGCGGTGGTGTACC  
GGCGGCGGGGAGATTCTCGGCCTCAACCTTTTGAAAGACATGATTCAATACAATGCGACGTGG  
TACACAGCGGTACCTACCATAACACGATCATACTAGATCGCCACCTAAATAACCCTGAACCGG  
CTTACCCGAAACTCCGGTTTATTAGAAGCTGTAGTGCTTTCGTTGGCACCGGTTATTCTAGGTCG  
CTTAGAGGAATCGTTTGGGGCACCAGTTTTTGAGGCTTATGCTATGACTGAGGCTTCTCATTTA  
ATGAGTTCGAATCCTTTGCCACAAAATGGGCCCCACAAAGCTGGATCGGTTGGGAAGCCCGTGG  
GTCAAGAAATGGCTATACTTGATGAGTCGGGCCGGGTTTTTGAGGCTGGAGTGAATGGTGAAGT  
TTGTATTAGAGGAGAAAATGTTACGAAAGGTTACAAGAATAATGAAGCAGCTAATACGGCAGCG  
TTTTTGTTTGGTTGGTTTCATACGGGTGACATTGGTTACTTTGATTCTGATGGATATTTGCATC  
TTGTGGGTCGGATTAAAGAGCTTATCAACAGAGGAGGAGAGAAAATATCACCAATAGAAGTGGA  
TGCTGTTCTTCTATCTCATCCAGACGTAGCTCAGGCCGTTGCTTTTGGAATACCAGATCAGAAA  
TATGGTGAAGAGATACATTGTGCAATCATAACCAAGAGAAGGATCAAACATTGATGCTGAAGAGG  
TGCTAACATTTTGAAGAAGAATCTGGCATCTTTCAAAGTCCCCAAAAGGTTTTTCATTACTGA  
TTCTCTGCCCAAGACGGCTACTGGCAAGATTTTGCGTCGTCCTTGTAGCAGAACACTTTGTTTCT  
AAAGTTTAA\*

### S3b. His-SUMO-LsOCS protein sequence:

MSKHHHHS GHHHTGHHHHS GSHHS SG SAAGGEEDKKPAGGEGGGAHINLKVKGQDGNEVFFRIK  
RSTQLKKLMNAYCDRQSVDMTAIAFLFDGRRLRAEQTPDELEMEDGDEIDAMLHQGTGETATTL  
TGLLQSVAKTFPSRRGISLAGKFDLTHSHLNLVESAADHLISAGIKPNDVVALTFPNTVEYVI  
LFLAVIRVRATAAPLNAAAYTAEFEFYLSDES KLLLLTPLEGNKPAQDAASKLSIPLGSASLTK  
SEEEETKL TISLKHPE SGLKSDSVNSVAKLINEPSDVALFLHTSGTTSRPGVPLTQHNLVSSVK  
NIQSVYQLTESDSTVIVLPLFHVHGLIAGLLSSLGSGAAVVLPAAGRFSASTFWKDMIQYNATW  
YTAVPTIHQIILDRHLNNPEPAYPKLRFIRSCSASLAPVILGRLEESFGAPVLEAYAMTEASHL  
MSSNPLPQNGPHKAGSVGKPVGQEMAILDESGRVLEAGVNGEVCIRGENVTGKYKNNEAANTAA  
FLFGWFHTGDIGYFSDGYLHLVGRIKELINRGGEKISPIEVDVALLSHPDVAQAVAFGIPDQK  
YGEEIHCAIIPREGSNIDAEEVLTFCKKNLASFKVPKKVFITDSL PKTATGKILRRLVAEHFVS  
KV\*

**Figure S3. Sequence of the cloned and expressed *LsOCS* gene**

**a.** The DNA sequence of *LsOCS* (1563 bp) was N-terminally fused to a 14-His tag (highlighted in yellow) followed by a bd-SUMO linker (highlighted in green). **b.** The protein sequence of *LsOCS* (521 aa), N-terminally fused to a 14-His tag (highlighted in yellow) and a bd-SUMO linker (highlighted in green)

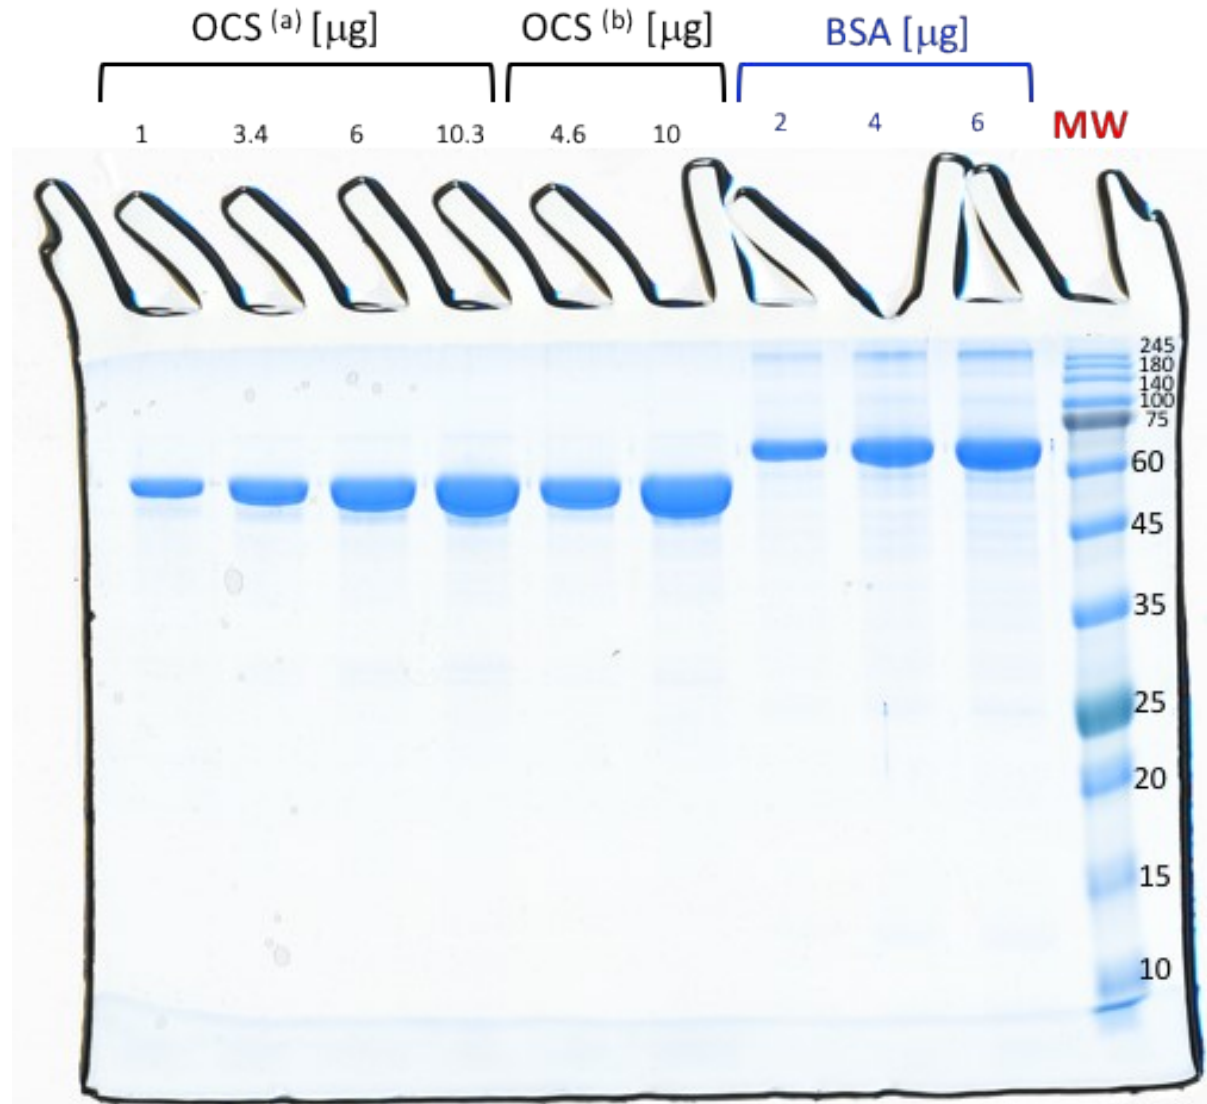

**Figure S4. SDS-PAGE gel of purified *LsOCS*.**

Increasing amounts of purified *LsOCS* protein were run on a 12% SDS-PAGE gel, and stained with Instant Blue™. The amounts, in micrograms, of *LsOCS* protein loaded in each lane are noted above the lane (six left lanes). *LsOCS*<sup>(a)</sup> and *LsOCS*<sup>(b)</sup> denote two different batches of purified protein used. A bovine serum albumin (BSA) standard was run as control (three lanes on the right). MW – prestained molecular weight markers.



S5a.

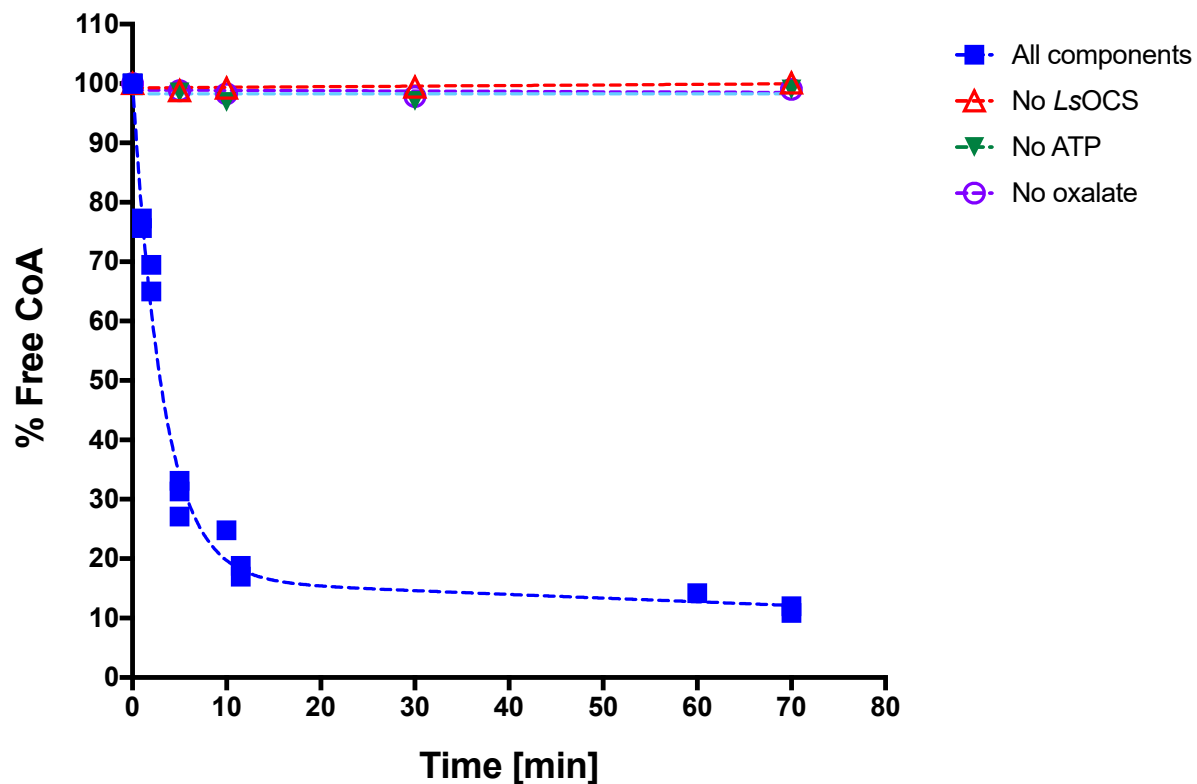

S5b.

|                 |                  |
|-----------------|------------------|
| Best-fit values |                  |
| Y0              | 100.2            |
| K               | 0.2875           |
| Y0              | 95.91 to 104.4   |
| K               | 0.2430 to 0.3398 |
| R squared       | 0.9897           |

**Figure S5. Time course of CoA ligation to oxalate catalyzed by LsOCS.**

**a.** A buffered solution (HEPES 125mM, pH 8) of  $MgCl_2$  (2mM), ATP (10mM), CoA (1.5mM) and purified LsOCS (0.25 $\mu$ M) was mixed with buffered NaOxalate (5mM, pH 8) and incubated at room temperature. At different time points, samples (100 $\mu$ l) were removed and mixed with a DTNB solution (100 $\mu$ l, 2mM). The absorption of the mixtures at 412nm was measured, and the concentration of free (i.e. unligated) CoA was calculated. The percent of free CoA in the ligation was plotted for each time point. **b.** The data of the reaction with all components was fit to an exponential decay curve  $Y=Y_0 \cdot e^{-kT}$ , in which  $Y$ = % of free CoA,  $Y_0$  = % of free CoA at time zero,  $k$  = the decay constant [ $min^{-1}$ ],  $T$  = time.



(4mM) and HEPES buffer (125mM) prior to incubation with *LsOCS* **d.** Reaction mixture (5μl) following 1h of incubation at 37°C with purified *LsOCS* (2μM). UPLC-MS (5e-h): **e.** CoA **f.** Oxalate. **g.** Reaction sample mix before incubation with *LsOCS* **h.** Reaction sample mix after incubation with *LsOCS*. Extracted ion chromatograms in positive (on left) and negative (on right) electrospray MS ionization are depicted for particular characteristic *m/z* values (noted at upper right corner of each panel).

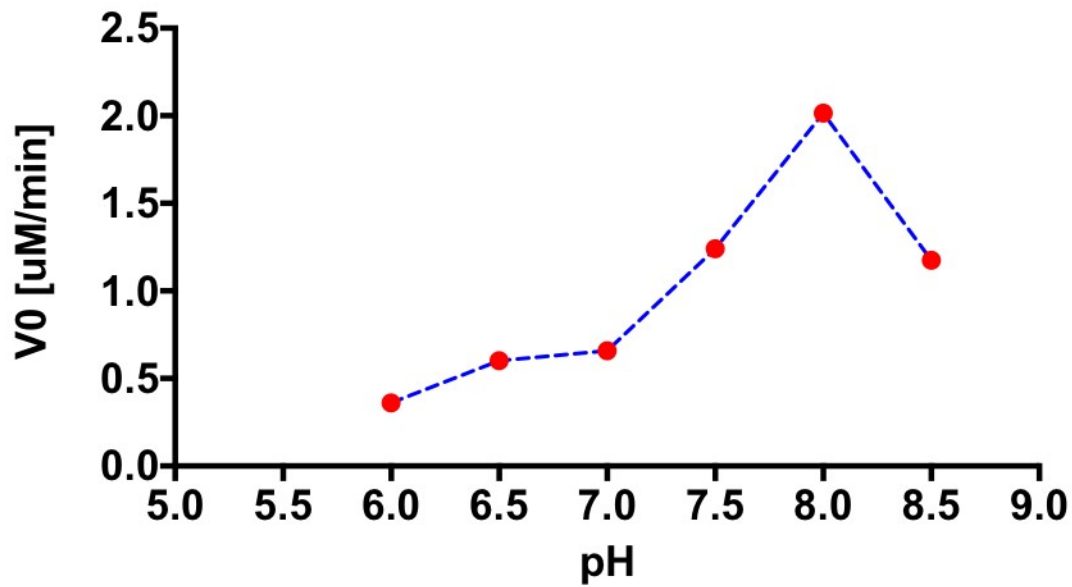

**Figure S7.** The activity of LsOC S at different pHs. The reaction rates of LsOC S (10  $\mu$

M) in the presence of oxalate (0.4mM),  $\text{MgCl}_2$  (5mM), ATP (0.5mM) and CoA (1mM), were measured in Tris-HCl buffered solutions (50mM) at different pH values. Shown are the corresponding initial reaction rates ( $V_0$ ).

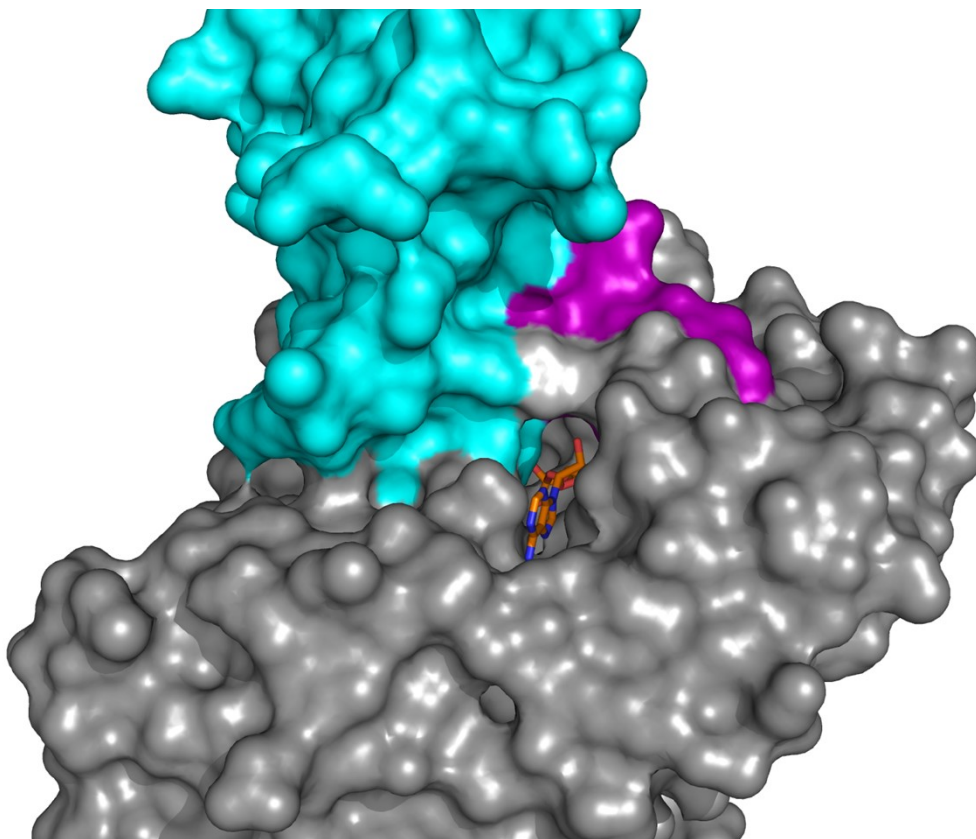

**Supplementary Figure S8. The substrate binding cavity of *LsOCS*.**

*LsOCS* crystal structure with the N- (residues 1-411) and C-terminal (residues 420-521) domains shown as grey and cyan surface plots, respectively. The hinge-loop region (<sup>417</sup>IKEL<sup>420</sup>) is shown in purple. The bound AMP is shown as an orange, blue and red stick model, residing in a cavity formed by the N- and C-terminal regions.

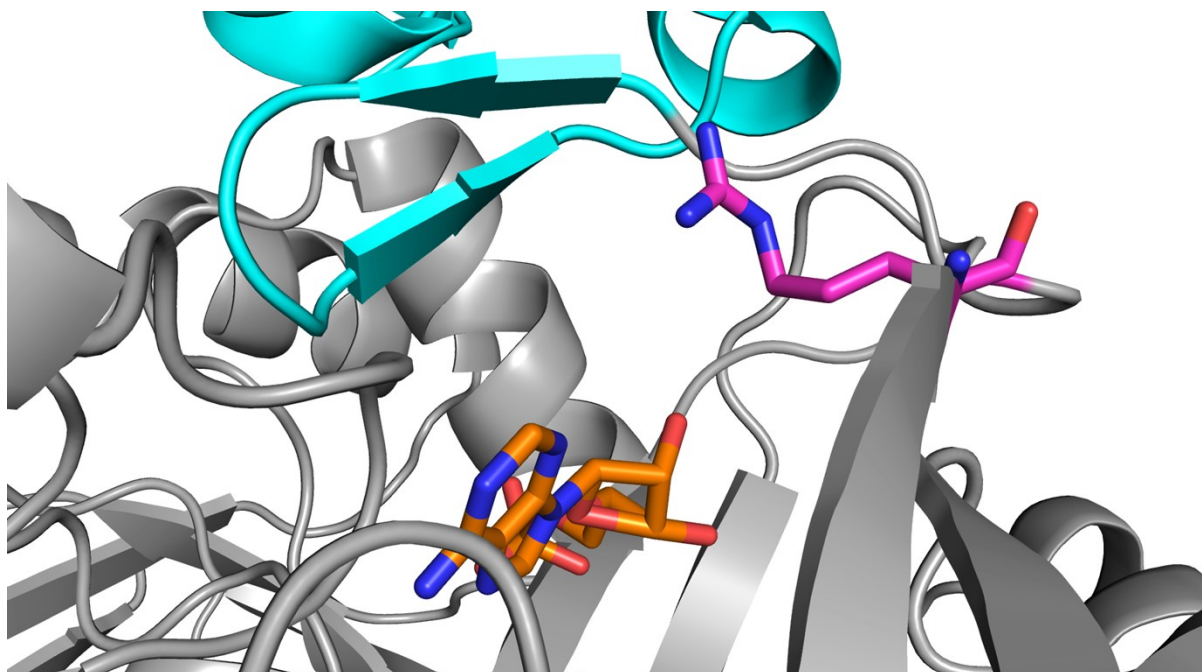

**Supplementary Figure S9. The position of Arg46.**

*LsOCS* crystal structure with the N- (residues 1-411) and C-terminal (residues 420-521) domains shown as grey and cyan cartoon plots, respectively. The bound AMP is shown as an orange, blue and red stick model. Arg416 is shown as a magenta, blue and red stick model, pointing away from the AMP ribose oxygens.

**S10a.**

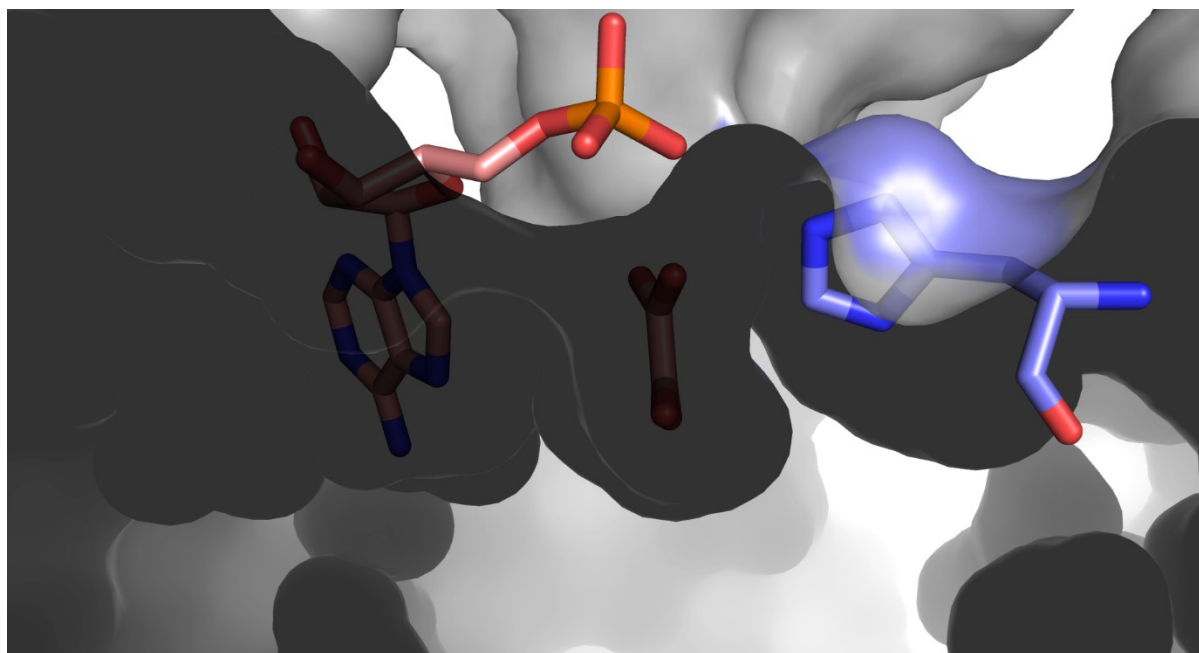

**S10b.**

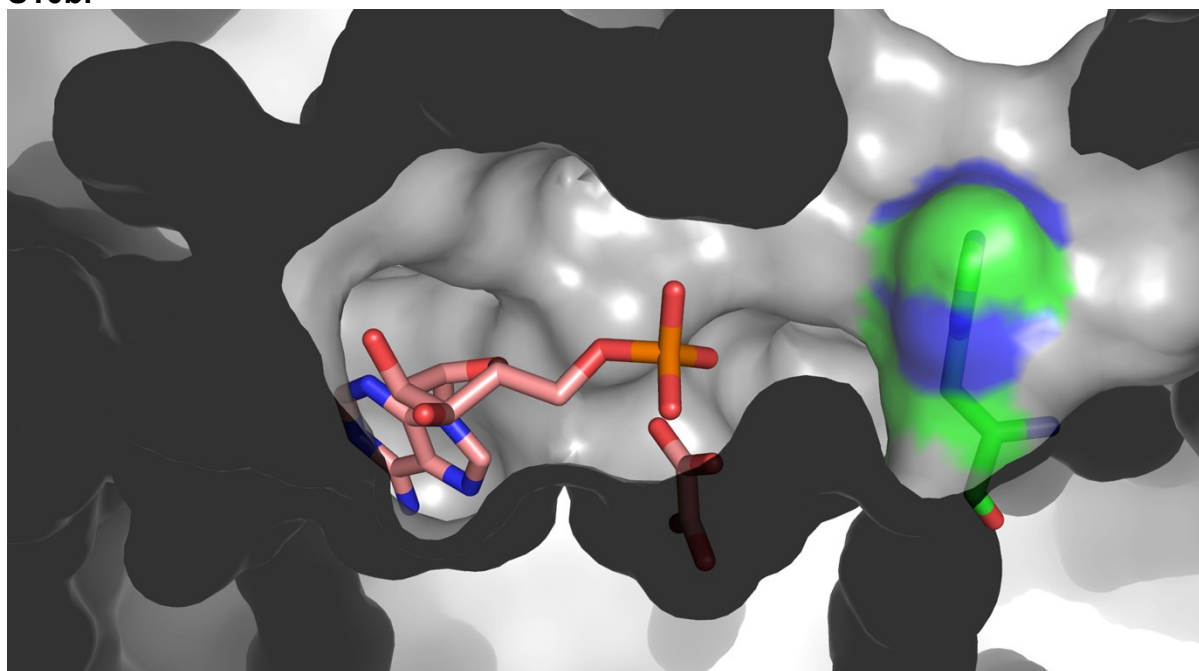

**Supplementary Figure S10. His221 blocking the pentathein tunnel of LsOCS.**

The structure of LsOCS was superimposed on that of AtAAE3 (PDB ID: 5IE3). The AMP and oxalate ligands bound to AtAAE3 are shown as pink, red and blue sticks. **a.** The imidazole ring of His221 of LsOCS is oriented such that it blocks the entrance of the pentathein tunnel. **b.** The imidazole ring of the corresponding His214 residue of AtAAE3,

which was crystalized in the adenylate-forming configuration, is rotated such that the entrance to the pentathein tunnel is open.
